# Supplementary material
Source: publisher site journal article supplement (https://www.dovepress.com/article/530349)
Supplement: Supplementary file 1 [file Supplementary%20Material.doc.docx]

**Supplementary Material**

**Anaesthesia Clerkship Curriculum for Medical Students**

**Goals:**

Upon completion of the anaesthesia clerkship rotation, fourth-year medical students will understand the implications of pre-existing diseases for patients undergoing anaesthesia. They will be familiar with common anaesthetic types, medications, techniques, and monitoring. They will be able to demonstrate competency in basic airway management and acute resuscitation.

**Specific Learning Objectives**

1. Understanding of pre-operative preparation and pre-operative assessment.

Objectives: establishing rapport, assuaging patient anxiety, familiarizing with the patient’s surgical illness and coexisting disease, medically optimizing the patient’s comorbidities, developing a strategy for perioperative anaesthetic care, and obtaining informed consent.

1. Being familiar with common anaesthetic types: procedures, indications, contraindications:

- General anaesthesia (induction, maintenance, emergence)
- Central neuraxial anaesthesia (spinal anaesthesia, epidural anaesthesia)
- Peripheral nerve blockade (brachial plexus blockade, femoral nerve block, sciatic nerve block): methods of nerve localization, techniques

1. Learn about commonly used anaesthetics as well as their clinical indications and side effects:

- Sedatives: propofol, midazolam, dexmedetomidine…
- Opioid agonists: fentanyl, sufentanil, remifentanil, morphine…
- Neuromuscular-blocking drugs: rocuronium, cisatracurium…
- Inhalation anaesthetics: sevoflurane
- Local anaesthetics: lidocaine, ropivacaine, bupivacaine…
- Others: commonly used vasopressors and inotropes

1. Learn about common anaesthetic techniques: procedures, indications, and contraindications.

- Tracheal intubation
- Radial arterial cannulation
- Internal jugular vein cannulation
- Peripheral nerve blockade

1. Learn about standard monitoring during anesthesia: ECG, HR, BP, SPO2, ETCO2, Temperature; as well as EEG monitoring.
2. Demonstrate basic proficiency in airway management:

- Know when and how to use face mask, oral or nasopharyngeal airway, laryngeal mask airway (LMA), endotracheal tube (ETT), and laryngoscopy.
- Learn the importance of pre-oxygenation.
- Should be able to treat respiratory depression.

1. Learn about intra-anaesthetic problems/ complications and post-anaesthesia management in the post-anaesthesia care unit (PACU).
2. Understand the indications, goals and complications of anaesthesia/ sedation outside of the operating room

**Teaching Model Used**

- Clinical bedside teaching
- Problem-based learning (PBL)
- Case-based learning (CBL)
- Simulation-based curriculum
- Lectures
- Small group discussion

**Schedule:**

**Prior preparation**

The lead supervisor is responsible for developing a comprehensive plan, including the learning goals, specific learning objectives, schedules and necessary equipment. This plan will be communicated to the students at least one day prior to the anaesthesia clerkship rotation to ensure preparedness.

**Morning session: focus on preoperative and intraoperative care and anaesthesia drugs:**

1. 4x1-hour blocks for clinical bedside teaching, problem-based learning and case-based learning
2. 1-hour block for discussion and summary of learning points in a question-and-answer (Q&A) style

**Afternoon session: focus on postoperative care, anaesthesia for endoscopy, and interactive case presentation by students**

1. 3x1-hour blocks for clinical bedside teaching, problem-based learning and case-based learning
2. 1-hour block for discussion and summary of learning points in a Q&A style

**Final discussion**

Conducted feedback and evaluation session for students to assess the learning experience and outcomes.
